# Supplementary material for: Cholinesterase inhibitors in patients with diabetes mellitus and dementia: an open-cohort study of ~23 000 patients from the Swedish Dementia Registry
Source: PubMed Central journal article supplement — BMJ Open Diabetes Res Care. 2020 Jan 15;8(1):e000833. doi: 10.1136/bmjdrc-2019-000833 (PMC7039592; doi:10.1136/bmjdrc-2019-000833), 2020-01-15
Supplement: bmjdrc-2019-000833supp001.pdf [file bmjdrc-2019-000833supp001.pdf]

Supplementary table 1. All-cause mortality and dose-response of cholinesterase inhibitor use

| Whole cohort analysis           |           | Diabetes & Dementia | Diabetes-free & Dementia |
|---------------------------------|-----------|---------------------|--------------------------|
| Fully adjusted models (Model 1) |           | HR (95% CI)         | HR (95% CI)              |
| ChEI                            | Non-user  | 1.41 (1.24-1.62)†   | 1.46 (1.38-1.55)†        |
|                                 | Low-dose  | Reference           | Reference                |
|                                 | High-dose | 0.98 (0.82-1.17)    | 0.99 (0.91-1.06)         |
| Donepezil                       | Non-user  | 1.29 (1.07-1.57)*   | 1.45 (1.33-1.58)†        |
|                                 | Low-dose  | Reference           | Reference                |
|                                 | High-dose | 0.97 (0.75-1.24)    | 0.99 (0.89-1.11)         |
| Rivastigmine                    | Non-user  | 1.35 (0.99-1.82)    | 1.15 (1.02-1.29)*        |
|                                 | Low-dose  | Reference           | Reference                |
|                                 | High-dose | 1.36 (0.93-2.01)    | 0.88 (0.75-1.04)         |
| Galantamine                     | Non-user  | 1.50 (1.21-1.86)†   | 1.42 (1.30-1.55)†        |
|                                 | Low-dose  | Reference           | Reference                |
|                                 | High-dose | 1.07 (0.76-1.50)    | 1.16 (1.02-1.33)*        |

  

| PS-matched cohorts |           | Diabetes & Dementia | Diabetes-free & Dementia |
|--------------------|-----------|---------------------|--------------------------|
|                    |           | HR (95% CI)         | HR (95% CI)              |
| ChEI               | Non-user  | 1.29 (1.12-1.47)†   | 1.28 (1.21-1.36)†        |
|                    | Low-dose  | Reference           | Reference                |
|                    | High-dose | 0.84 (0.63-1.12)    | 1.17 (1.04 -1.32)†       |
| Donepezil          | Non-user  | 1.15 (1.01-1.32)*   | 1.19 (1.12 -1.25)†       |
|                    | Low-dose  | Reference           | Reference                |
|                    | High-dose | 0.74 (0.51-1.07)    | 1.07 (0.94-1.22)         |
| Rivastigmine       | Non-user  | 1.13 (0.90-1.44)    | 1.03 (0.94-1.13)         |
|                    | Low-dose  | Reference           | Reference                |
|                    | High-dose | 1.34 (0.99-1.82)    | 1.26 (1.11-1.44)†        |
| Galantamine        | Non-user  | 1.30 (1.03-1.54)*   | 1.09 (1.01-1.18)*        |
|                    | Low-dose  | Reference           | Reference                |
|                    | High-dose | 1.09 (0.74-1.62)    | 1.09 (0.95-1.25)         |

ChEI, cholinesterase inhibitors;

Dosage groups were obtained by splitting on the 50th percentile of prescribed daily doses received during all yearly intervals for respective exposure cohorts;

Model 1 was adjusted for age at dementia diagnosis, gender, dementia type, cohabitation, Mini-Mental State Examination score, Charlson comorbidity index, antipsychotics, hypnotics/sedatives, cardiovascular and antithrombotic medication; Model 1 for the analysis in Diabetes & Dementia patients was additionally adjusted for the use of antidiabetic medication and diabetes duration;

PS-matched analysis of ChEI is adjusted for age and MMSE in the Diabetes-Free cohort, and age and dementia type in the Diabetes cohort due to residual differences in the matched cohorts; \*p-value <0.05; †p-value <0.001

Supplementary table 2. Balance statistics in propensity-score matched cohorts by donepezil use

|     | Diabetes & Dementia          |                                  | p    | SMD   |
|-----|------------------------------|----------------------------------|------|-------|
|     | Donepezil +<br>(1,246 users) | Donepezil –<br>(1,246 non-users) |      |       |
| Age | 78.5 (6.7)                   | 78.9 (7.4)                       | 0.21 | -0.05 |

|                            |                      |               |               |      |       |
|----------------------------|----------------------|---------------|---------------|------|-------|
| Male sex                   |                      | 531 (42.6%)   | 535 (42.9 %)  | 0.87 | -0.01 |
| Dementia                   | AD                   | 777 (62.4%)   | 749 (60.1%)   | 0.25 | -0.05 |
|                            | Mixed                | 469 (37.6%)   | 497 (39.9%)   |      |       |
| Cohabitation               | Living alone         | 530 (42.5%)   | 536 (43.0%)   | 0.01 | -0.04 |
|                            | Living with an adult | 669 (53.7%)   | 632 (50.7%)   |      |       |
|                            | At nursing home      | 47 (3.8%)     | 78 (6.3%)     |      |       |
| MMSE score                 |                      | 22 (6)        | 22 (7)        | 0.59 | 0.06  |
| Charlson comorbidity index |                      | 2 (2)         | 2 (2)         | 0.29 | -0.05 |
| Antidiabetic medication    |                      | 1,056 (84.8%) | 1,033 (82.9%) | 0.23 | 0.05  |
| Cardiovascular medication  |                      | 1,151 (92.4%) | 1,152 (92.5%) | 0.94 | -0.01 |
| Antithrombotic medication  |                      | 825 (66.2%)   | 860 (69.0%)   | 0.13 | -0.06 |
| Antipsychotics             |                      | 37 (3.0%)     | 31 (2.5%)     | 0.46 | 0.03  |
| Hypnotics/Sedatives        |                      | 302 (24.2%)   | 325 (26.1%)   | 0.29 | -0.04 |
| Diabetes duration          |                      | 5.8 (8)       | 6.6 (7.5)     | 0.04 | 0.03  |

## Diabetes-free &amp; Dementia

|                            | Donepezil +<br>(7,942 users) | Donepezil –<br>(7,942 non-users) | p      | SMD   |               |
|----------------------------|------------------------------|----------------------------------|--------|-------|---------------|
| Age                        | 79.0 (7.3)                   | 79.0 (8.4)                       | 0.53   | -0.01 |               |
| Male sex                   | 2,751 (34.6%)                | 2,820 (35.5%)                    | 0.25   | -0.02 |               |
| Dementia                   | AD                           | 5,590 (70.4%)                    | 0.27   | -0.02 |               |
|                            | Mixed                        | 2,352 (29.6%)                    |        |       | 2,416 (30.4%) |
| Cohabitation               | Living alone                 | 3,554 (44.7%)                    | <0.001 | -0.03 |               |
|                            | Living with an adult         | 4,102 (51.6%)                    |        |       | 3,988 (50.2%) |
|                            | At nursing home              | 286 (3.6%)                       |        |       | 408 (5.1%)    |
| MMSE score                 | 22 (6)                       | 22 (7)                           | <0.001 | 0.09  |               |
| Charlson comorbidity index | 1 (1)                        | 1 (2)                            | 0.02   | -0.03 |               |
| Cardiovascular medication  | 5,310 (66.9%)                | 5,343 (67.3%)                    | 0.58   | -0.01 |               |
| Antithrombotic medication  | 3,510 (44.2%)                | 3,551 (44.7%)                    | 0.51   | -0.01 |               |
| Antipsychotics             | 255 (3.2%)                   | 238 (3.0%)                       | 0.44   | 0.01  |               |
| Hypnotics/Sedatives        | 2,005 (25.2%)                | 2,031 (25.6%)                    | 0.64   | -0.01 |               |

AD, Alzheimer's disease; Mixed, mixed-pathology dementia; MMSE, Mini-Mental State Examination; ChEI,

cholinesterase inhibitors; SMD, standardized mean differences;

Age is described as mean (SD); MMSE score, diabetes duration (in years) and Charlson index are described as median (IQR); Other variables are described as number of patients (%);

## Supplementary table 3. Balance statistics in propensity-score matched cohorts by rivastigmine use

|                            |                      | Diabetes & Dementia           |                                   | p    | SMD   |
|----------------------------|----------------------|-------------------------------|-----------------------------------|------|-------|
|                            |                      | Rivastigmine +<br>(478 users) | Rivastigmine –<br>(478 non-users) |      |       |
| Age                        |                      | 77.1 (6.9)                    | 77.5 (6.8)                        | 0.36 | -0.06 |
| Male sex                   |                      | 227 (47.5%)                   | 239 (50.0%)                       | 0.44 | -0.05 |
| Dementia                   | AD                   | 271 (56.7%)                   | 277 (57.9%)                       | 0.70 | 0.03  |
|                            | Mixed                | 207 (43.3%)                   | 201 (42.1%)                       |      |       |
| Cohabitation               | Living alone         | 175 (36.6%)                   | 177 (37.0%)                       | 0.07 | -0.05 |
|                            | Living with an adult | 287 (60.0%)                   | 270 (56.5%)                       |      |       |
|                            | At nursing home      | 16 (3.3%)                     | 31 (6.5%)                         |      |       |
| MMSE score                 |                      | 22 (5)                        | 23 (5)                            | 0.88 | -0.01 |
| Charlson comorbidity index |                      | 2 (2)                         | 2 (2)                             | 0.87 | 0.03  |
| Antidiabetic medication    |                      | 387 (81.0%)                   | 385 (80.5%)                       | 0.87 | 0.01  |
| Cardiovascular medication  |                      | 441 (92.3%)                   | 442 (92.5%)                       | 0.90 | -0.01 |
| Antithrombotic medication  |                      | 336 (70.3%)                   | 329 (68.8%)                       | 0.62 | 0.03  |
| Antipsychotics             |                      | 21 (4.4%)                     | 21 (4.4%)                         | 1.00 | <0.01 |
| Hypnotics/Sedatives        |                      | 113 (23.6%)                   | 99 (20.7%)                        | 0.28 | 0.07  |
| Diabetes duration          |                      | 5.5 (6.7)                     | 5.6 (6.8)                         | 0.92 | 0.01  |

## Diabetes-free &amp; Dementia

|                            | Rivastigmine +<br>(3,363 users) | Rivastigmine –<br>(3,363 non-users) | p             | SMD    |       |
|----------------------------|---------------------------------|-------------------------------------|---------------|--------|-------|
| Age                        | 76.7 (7.9)                      | 77.0 (8.3)                          | 0.11          | -0.04  |       |
| Male sex                   | 1,274 (37.9%)                   | 1,283 (38.2%)                       | 0.82          | -0.01  |       |
| Dementia                   | AD                              | 2,259 (67.2%)                       | 2,294 (68.2)  | 0.36   | 0.02  |
|                            | Mixed                           | 1,104 (32.8%)                       | 1,069 (31.8%) |        |       |
| Cohabitation               | Living alone                    | 1,124 (33.4%)                       | 1,211 (36.0%) | <0.001 | -0.02 |
|                            | Living with an adult            | 2,125 (63.2%)                       | 1,924 (57.2%) |        |       |
|                            | At nursing home                 | 114 (3.4%)                          | 228 (6.8%)    |        |       |
| MMSE score                 | 23 (7)                          | 23 (5)                              | 0.82          | -0.01  |       |
| Charlson comorbidity index | 1 (1)                           | 1 (1)                               | 0.78          | -0.01  |       |
| Cardiovascular medication  | 2,204 (65.5%)                   | 2,223 (66.1%)                       | 0.63          | -0.01  |       |
| Antithrombotic medication  | 1,428 (42.5%)                   | 1,444 (42.9%)                       | 0.69          | -0.01  |       |
| Antipsychotics             | 156 (4.6%)                      | 180 (5.4%)                          | 0.18          | -0.03  |       |
| Hypnotics/Sedatives        | 850 (25.3%)                     | 862 (25.6%)                         | 0.74          | -0.01  |       |

AD, Alzheimer's disease; Mixed, mixed-pathology dementia; MMSE, Mini-Mental State Examination; ChEI, cholinesterase inhibitors; SMD, standardized mean differences;

Age is described as mean (SD); MMSE score, diabetes duration (in years) and Charlson index are described as median (IQR); Other variables are described as number of patients (%);

Supplementary table 4. Balance statistics for propensity-score matched cohorts by galantamine use

|                            |                      | Diabetes & Dementia            |                                    |      |       |
|----------------------------|----------------------|--------------------------------|------------------------------------|------|-------|
|                            |                      | Galantamine +<br>(516 users)   | Galantamine –<br>(516 non-users)   | p    | SMD   |
| Age                        |                      | 77.3 (6.9)                     | 77.2 (7.2)                         | 0.90 | 0.01  |
| Male sex                   |                      | 229 (44.4%)                    | 222 (43.0%)                        | 0.66 | 0.03  |
| Dementia                   | AD                   | 258 (50.0%)                    | 250 (48.4%)                        | 0.62 | -0.03 |
|                            | Mixed                | 258 (50.0%)                    | 266 (51.6%)                        |      |       |
| Cohabitation               | Living alone         | 213 (41.3%)                    | 221 (42.8%)                        | 0.21 | -0.01 |
|                            | Living with an adult | 287 (55.6%)                    | 269 (52.1%)                        |      |       |
|                            | At nursing home      | 16 (3.1%)                      | 26 (5.0%)                          |      |       |
| MMSE score                 |                      | 23 (6)                         | 22 (6)                             | 0.45 | 0.03  |
| Charlson comorbidity index |                      | 2 (2)                          | 2 (1)                              | 0.68 | -0.02 |
| Antidiabetic medication    |                      | 431 (83.5%)                    | 438 (84.9%)                        | 0.55 | -0.04 |
| Cardiovascular medication  |                      | 472 (91.5%)                    | 477 (92.4%)                        | 0.57 | -0.03 |
| Antithrombotic medication  |                      | 355 (68.8%)                    | 351 (68.0%)                        | 0.79 | 0.02  |
| Antipsychotics             |                      | 21 (4.1%)                      | 23 (4.5%)                          | 0.76 | -0.02 |
| Hypnotics/Sedatives        |                      | 132 (25.6%)                    | 137 (26.6%)                        | 0.72 | -0.02 |
| Diabetes duration          |                      | 5.4 (7.5)                      | 5.7 (7.5)                          | 0.65 | 0.03  |
|                            |                      | Diabetes-free & Dementia       |                                    |      |       |
|                            |                      | Galantamine +<br>(4,157 users) | Galantamine –<br>(4,157 non-users) | p    | SMD   |
| Age                        |                      | 76.6 (8.2)                     | 76.7 (8.3)                         | 0.54 | -0.01 |
| Male sex                   |                      | 1,428 (34.4%)                  | 1,447 (34.8%)                      | 0.66 | -0.01 |
| Dementia                   | AD                   | 2,747 (66.1%)                  | 2,750 (66.2%)                      | 0.95 | 0.01  |
|                            | Mixed                | 1,410 (33.9%)                  | 1,407 (33.8%)                      |      |       |
| Cohabitation               | Living alone         | 1,738 (41.8%)                  | 1,778 (42.8%)                      | 0.01 | <0.01 |
|                            | Living with an adult | 2,313 (55.6%)                  | 2,232 (53.7%)                      |      |       |
|                            | At nursing home      | 106 (2.5%)                     | 147 (3.5%)                         |      |       |
| MMSE score                 |                      | 23 (6)                         | 23 (6)                             | 0.22 | 0.01  |
| Charlson comorbidity index |                      | 1 (1)                          | 1 (1)                              | 0.05 | -0.02 |
| Cardiovascular medication  |                      | 2,647 (63.7%)                  | 2,674 (64.3%)                      | 0.54 | -0.01 |
| Antithrombotic medication  |                      | 1,703 (41.0%)                  | 1,743 (41.9%)                      | 0.37 | -0.02 |
| Antipsychotics             |                      | 169 (4.1%)                     | 168 (4.0%)                         | 0.96 | 0.01  |
| Hypnotics/Sedatives        |                      | 1,008 (24.2%)                  | 999 (24.0%)                        | 0.82 | 0.01  |

AD, Alzheimer's disease; Mixed, mixed-pathology dementia; MMSE, Mini-Mental State Examination; ChEI, cholinesterase inhibitors; SMD, standardized mean differences;  
Age is described as mean (SD); MMSE score, diabetes duration (in years) and Charlson index are described as median (IQR); Other variables are described as number of patients (%);

**Supplementary figure 1. Study sample selection**

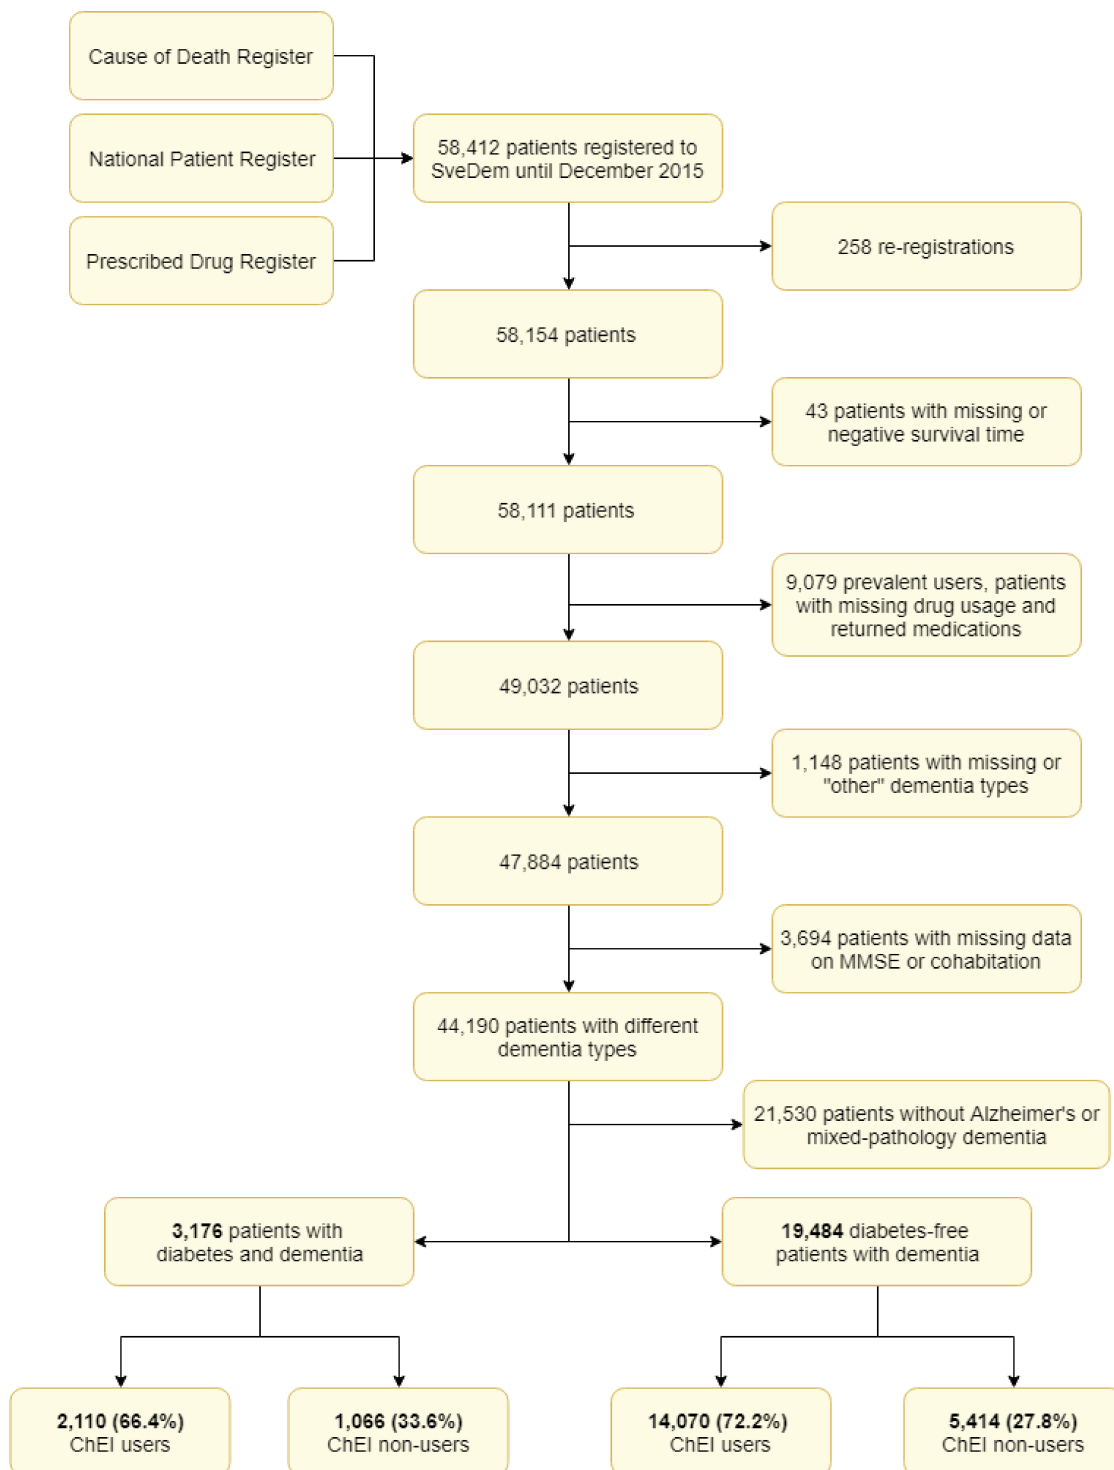

ChEI, cholinesterase inhibitors;

Supplementary figure 2. Assignment of exposure times for the whole-cohort analysis

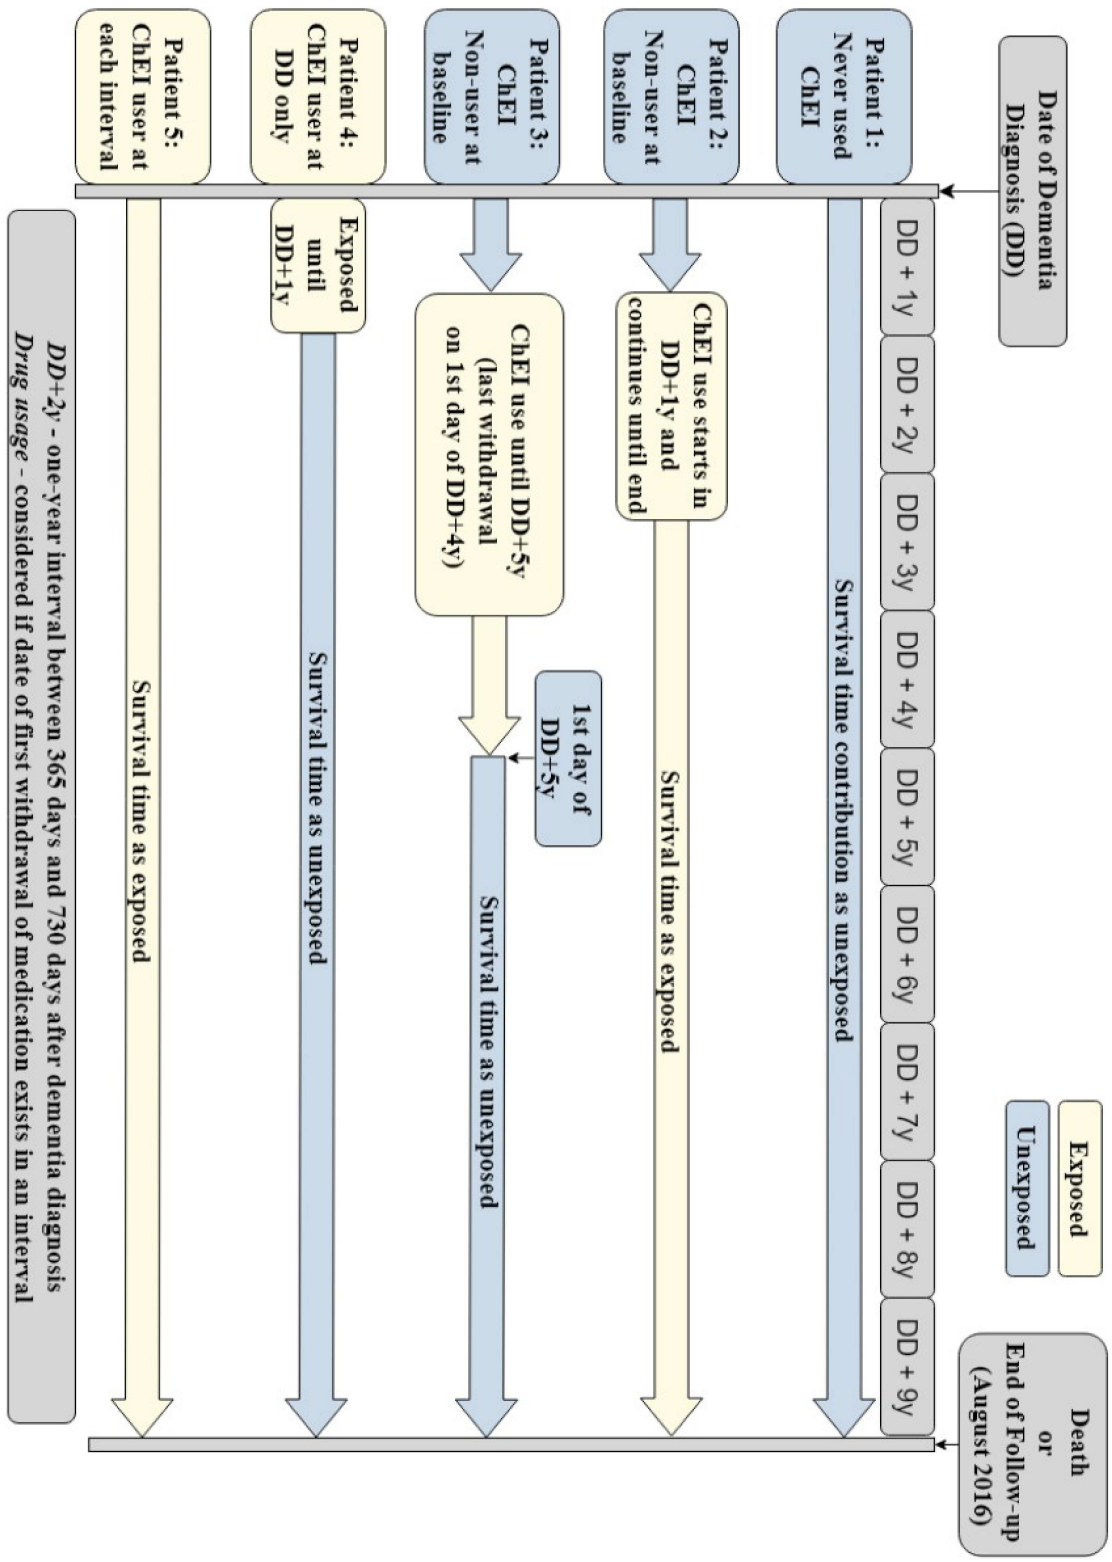

ChEI, cholinesterase inhibitors;
